# Supplementary material
Source: PubMed Central journal article supplement (PMC7667638)
Supplement: jm0c01107_si_001.pdf [file jm0c01107_si_001.pdf]

# Supporting Information

## Two for the Price of One:

### Heterobivalent Ligand Design Targeting Two Binding Sites on Voltage-Gated Sodium Channels Slows Ligand Dissociation and Enhances Potency

Alicia Peschel,<sup>†,#</sup> Fernanda C. Cardoso,<sup>†,#</sup> Andrew A. Walker,<sup>†</sup> Thomas Durek,<sup>†</sup> M. Rhia L. Stone,<sup>†</sup> Nayara Braga Emidio,<sup>†</sup> Philip E. Dawson,<sup>§</sup> Markus Muttenthaler,<sup>\*,†,‡</sup> and Glenn F. King<sup>\*,†</sup>

<sup>†</sup> Institute for Molecular Bioscience, The University of Queensland, St Lucia, QLD 4072, Australia

<sup>§</sup> Department of Chemistry, The Scripps Research Institute, La Jolla, CA, USA

<sup>‡</sup> Institute of Biological Chemistry, Faculty of Chemistry, University of Vienna, 1090 Vienna, Austria

<sup>#</sup> equal contributions

#### \* corresponding authors:

A/Prof. Markus Muttenthaler, Institute of Biological Chemistry, Faculty of Chemistry, University of Vienna, 1090 Vienna, Austria. Phone (+43) 1 4277 70515; Email: markus.muttenthaler@univie.ac.at.

Prof. Glenn King, Institute for Molecular Bioscience, The University of Queensland, St Lucia, QLD 4072, Australia. Phone (+61) 7 3346-2025; Email: glenn.king@imb.uq.edu.au.

## Table of Contents

### Supporting Figures

|                                                                                                                                                                                         |    |
|-----------------------------------------------------------------------------------------------------------------------------------------------------------------------------------------|----|
| Figure S1: Cryo-electron microscopy structures for determination of suitable linker length .....                                                                                        | S3 |
| Figure S2: Characterization of reduced and folded $\mu$ -KIIIA and AzK-KIIIA peptides .....                                                                                             | S4 |
| Figure S3: Analytical HPLC traces and MS analysis of S- $m_3$ -Huwentoxin-IV .....                                                                                                      | S5 |
| Figure S4: Detailed linker synthesis scheme to produce heterobifunctionalized (alkyne and hydrazide) polyethylene glycol (PEG) linkers.....                                             | S6 |
| Figure S5: Characterization of PEG linkers.....                                                                                                                                         | S6 |
| Figure S6: Conjugation of $m_3$ -HwTx-IV to KIIIA via a heterobifunctional PEG linker using bioorthogonal hydrazide ligation and copper-assisted azide-alkyne cycloaddition.....        | S7 |
| Figure S7: Characterization of the hydrazone ligation reaction .....                                                                                                                    | S7 |
| Figure S8: Analytical RP-HPLC trace and high resolution mass spectra of [ $m_3$ -HwTx-IV]-[PEG80]-[K-KIIIA] and table of calculated and observed masses of all conjugated ligands ..... | S8 |

### Supporting Table

|                                                                                                                                                                                            |    |
|--------------------------------------------------------------------------------------------------------------------------------------------------------------------------------------------|----|
| Table S1: Inhibitory potency of $\mu$ -KIIIA and AzK-KIIIA analogues against human voltage-gated sodium channel 1.7 (hNav1.7) determined by automated electrophysiology using QPatch ..... | S5 |
| References.....                                                                                                                                                                            | S9 |

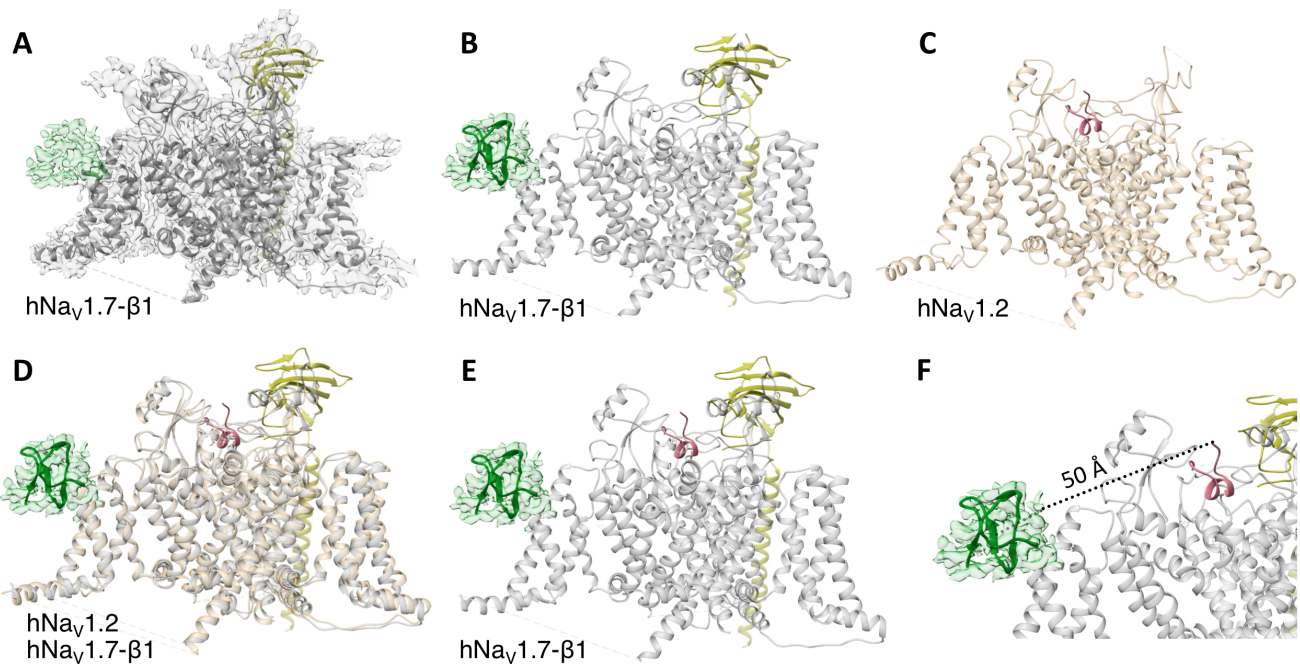

**Figure S1:** Cryo-electron microscopy structures for determination of suitable linker length. (A) hNav1.7-β1 complex and overall electron density map in surface style. (B) hNav1.7-β1 with electron density blob for HwTx-IV (green) above VSDII.<sup>1</sup> The m<sub>3</sub>-HwTx-IV peptide has been randomly positioned in this blob of density as accurate docking of the toxin structure was not possible due to the unknown binding sites and interactions. (C) hNav1.2 bound to μ-KIIIA (magenta).<sup>2</sup> (D) hNav1.7-β1 and hNav1.2 were aligned in Chimera to obtain μ-KIIIA's position in hNav1.7-β1 (alignment algorithm: Needleman-Wunsch; matrix: BLOSUM-62). (E) hNav1.7-β1 in the presence of m<sub>3</sub>-HwTx-IV and μ-KIIIA. (F) Zoomed in view with measured distance of ~50 Å between the center of the HwTx-IV density blob and the N-terminus of μ-KIIIA (PDB IDs 5T3M, 6J8E, 6J8G and EMD-9781).

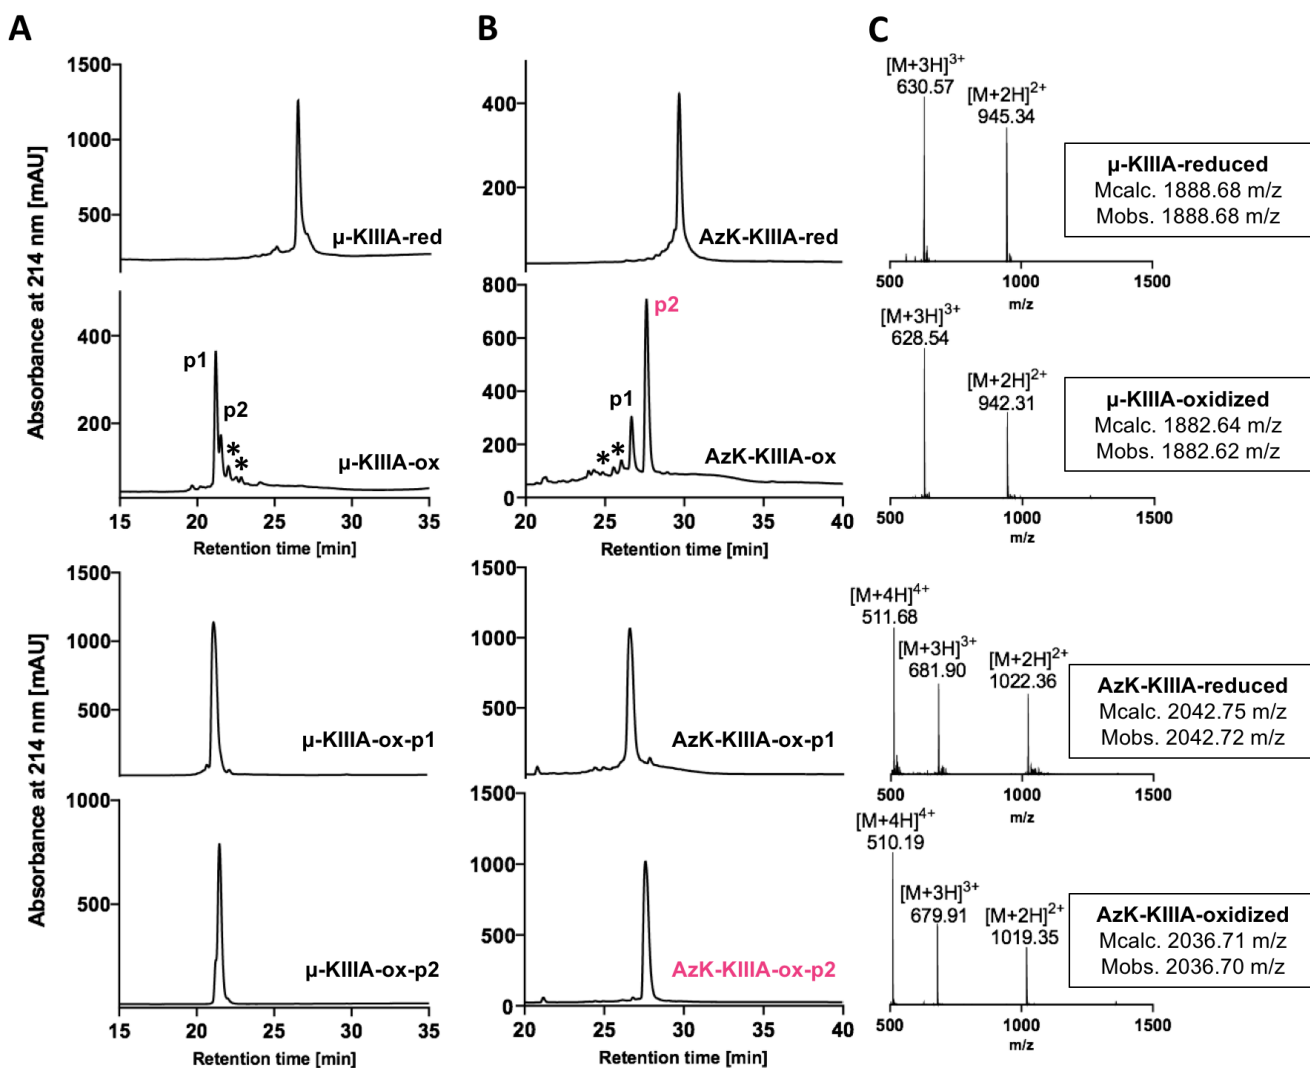

**Figure S2:** Characterization of reduced and folded  $\mu$ -KIIIA and AzK-KIIIA peptides. (A, B) RP-HPLC chromatograms of the reduced and folded peptides. After oxidative folding of the reduced peptides, two distinct peaks (p1 and p2) with identical monoisotopic mass values (1882.62 Da for  $\mu$ -KIIIA, 2036.70 Da for AzK-KIIIA) were obtained on analytical RP-HPLC. This oxidative folding pattern of  $\mu$ -KIIIA has been previously reported,<sup>3</sup> with the major product (p1) adopting a (Cys<sup>I</sup>-Cys<sup>V</sup>, Cys<sup>II</sup>-Cys<sup>IV</sup>, Cys<sup>III</sup>-Cys<sup>VI</sup>) connectivity and the minor product (p2) adopting a (Cys<sup>I</sup>-Cys<sup>VI</sup>, Cys<sup>II</sup>-Cys<sup>IV</sup>, Cys<sup>III</sup>-Cys<sup>V</sup>) connectivity. Other minor oxidative side products (\*) were not characterized. AzK-KIIIA peptide used for bioorthogonal ligation is colored in magenta. RP-HPLC was performed using an analytical C<sub>18</sub> column at a flow rate of 0.2 mL/min and a 1% linear gradient ranging from 0 to 35% or 40% solvent B, where solvent A was 0.05% TFA in water, and solvent B was 0.043% TFA in 90/10% (v/v) acetonitrile/water. UV absorbance was monitored at 214 nm. (C) LC-ESI-MS (positive ion mode) spectra of the linear and oxidized peptides obtained on a high-resolution mass spectrometer. p: RP-HPLC peak; red: reduced peptide; ox: oxidized peptide; Mcalc.: calculated ion mass; Mobs.: experimentally observed ion mass.

**Table S1:** Inhibitory potency of  $\mu$ -KIIIA and AzK-KIIIA analogues at hNav1.7 determined by electrophysiology using a QPatch 16X automated patch-clamp system. The major folding product of AzK-KIIIA ( $\mu$ -KIIIA-ox-p2) used for bioorthogonal conjugation is highlighted in bold. The IC<sub>50</sub> values are mean (in nM)  $\pm$  SEM of *n* number of independent experiments. p: RP-HPLC peak.

| Ligands                | IC <sub>50</sub> [nM]<br>(mean $\pm$ SEM) | <i>n</i> |
|------------------------|-------------------------------------------|----------|
| <i>hNav1.7</i>         |                                           |          |
| $\mu$ -KIIIA-ox-p1     | 132 $\pm$ 37                              | 4        |
| $\mu$ -KIIIA-ox-p2     | 154 $\pm$ 15                              | 3        |
| AzK-KIIIA-ox-p1        | 934 $\pm$ 572                             | 3        |
| <b>AzK-KIIIA-ox-p2</b> | <b>96 <math>\pm</math> 41</b>             | <b>3</b> |

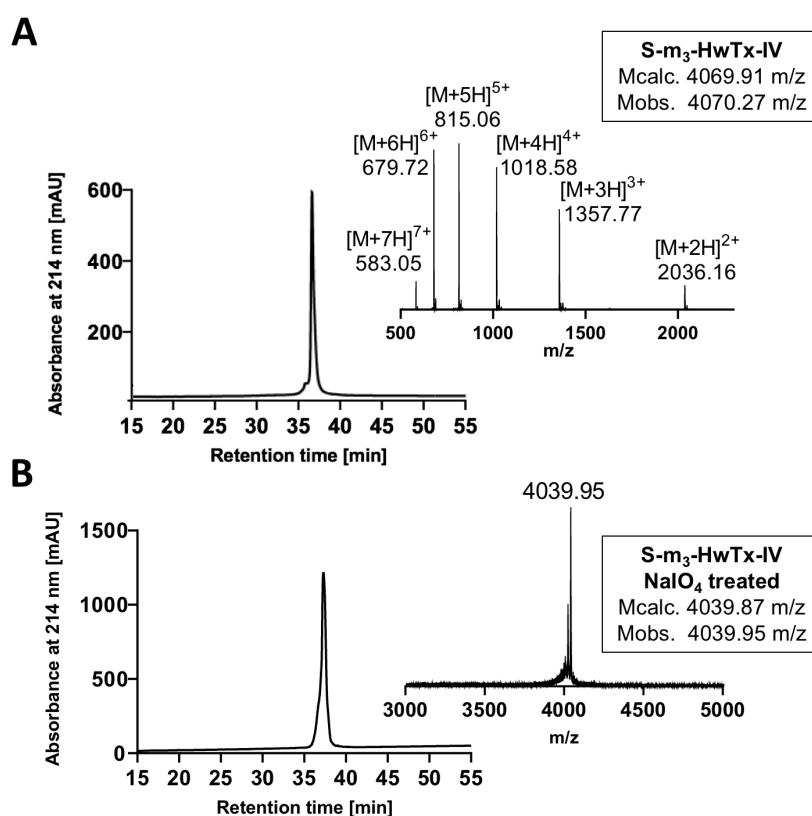

**Figure S3:** Analytical HPLC chromatograms and MS analysis of S-m<sub>3</sub>-Huwentoxin-IV. (A) and sodium periodate treated S-m<sub>3</sub>-Huwentoxin-IV (B). RP-HPLC was performed using an analytical C<sub>18</sub> column at a flow rate of 0.2 mL/min over a 1% linear gradient ranging from 0 to 55% solvent B. Solvent A was 0.05% TFA in water, and solvent B was 0.043% TFA in 90/10% (v/v) acetonitrile/water. LC-ESI-MS (positive ion mode) was performed on a high-resolution mass spectrometer for S-m<sub>3</sub>-Huwentoxin-IV and MALDI-TOF analysis was performed for sodium periodate treated S-m<sub>3</sub>-Huwentoxin-IV. Mcalc: calculated ion mass; Mobs: experimental observed ion mass.

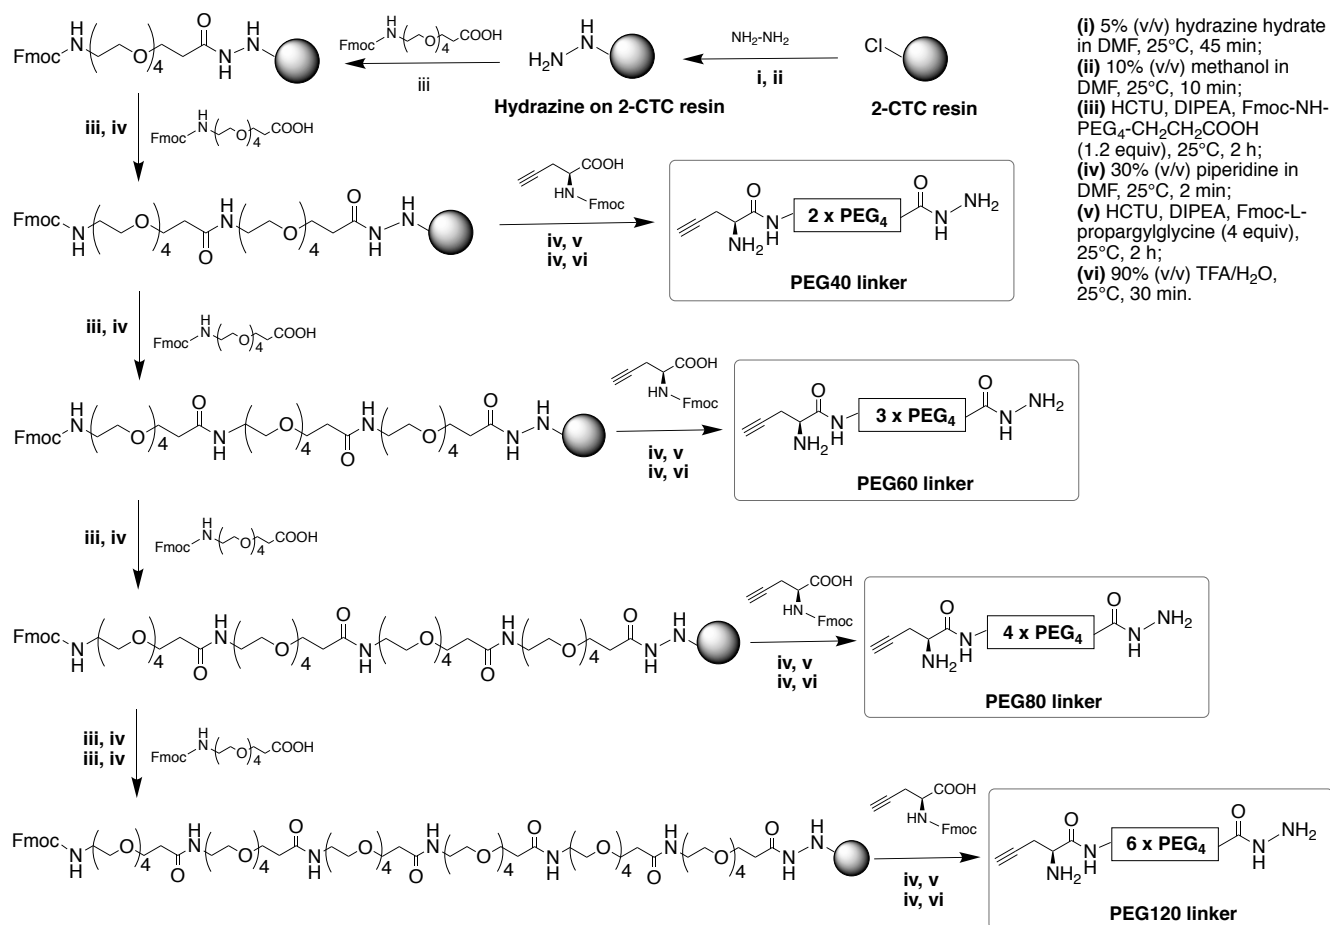

**Figure S4:** Details of linker synthesis scheme to produce heterobifunctionalized (alkyne and hydrazide) polyethylene glycol (PEG) linkers. 2-Chlorotrityl chloride (2-CTC) resin was converted to 2-chlorotrityl hydrazine resin. Unreacted sites were capped with an excess of methanol. Couplings of Fmoc-protected PEG<sub>4</sub> were carried out using standard Fmoc-SPPS protocols. Fmoc-L-propargylglycine was used as the final amino acid to incorporate an alkyne moiety. The PEG linkers were cleaved with TFA and purified using RP-HPLC.

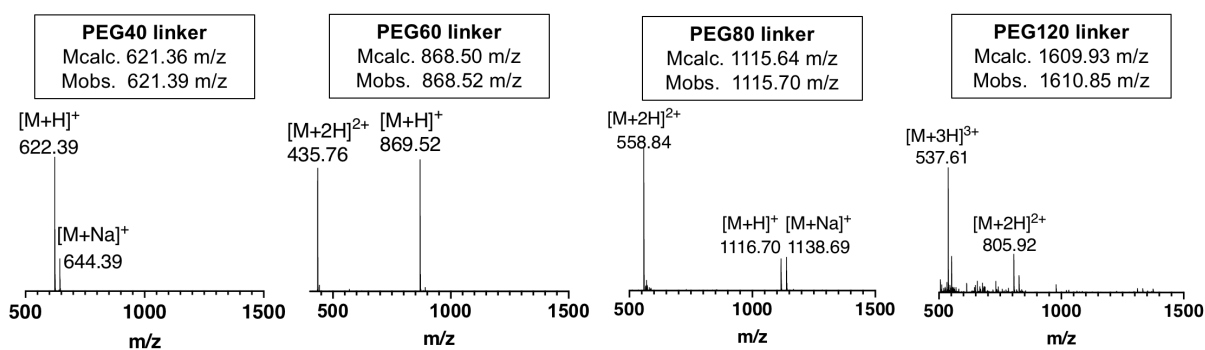

**Figure S5:** Characterization of PEG linkers. ESI-MS spectra of PEG linkers observed with LC-ESI-MS (positive ion mode) on a high-resolution API Qstar Pulsar mass spectrometer (PerkinElmer Sciex, Foster City, USA). In the PEG40 and PEG80 spectra, sodium adducts (+22) were observed for PEG40 (622.4) and PEG80 (1116.6). Mcalc: calculated ion mass; Mobs: experimental observed ion mass.



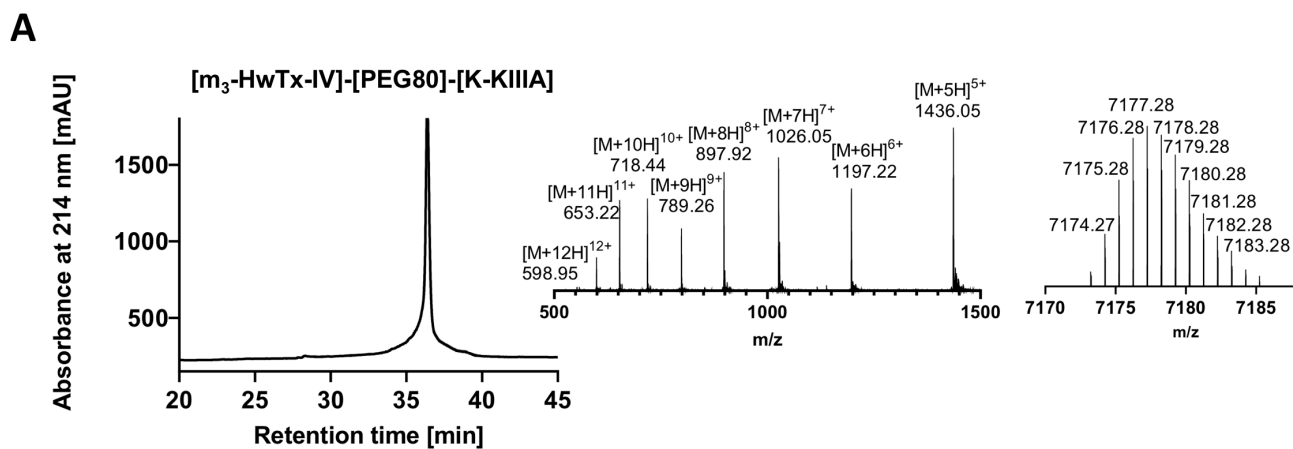

**B**

| Ligand                                           | Linker Length | Mcalc. [m/z]   | Mobs. [m/z]    |
|--------------------------------------------------|---------------|----------------|----------------|
| [m <sub>3</sub> -HwTx-IV]-[PEG40]-[K-KIIIA]      | 45 Å          | 6679.95        | 6679.96        |
| [m <sub>3</sub> -HwTx-IV]-[PEG60]-[K-KIIIA]      | 64 Å          | 6927.09        | 6927.11        |
| <b>[m<sub>3</sub>-HwTx-IV]-[PEG80]-[K-KIIIA]</b> | <b>84 Å</b>   | <b>7174.23</b> | <b>7174.27</b> |
| [m <sub>3</sub> -HwTx-IV]-[PEG120]-[K-KIIIA]     | 123 Å         | 7668.52        | 7668.42        |
| [m <sub>3</sub> -HwTx-IV]-[PEG80]                | 84 Å          | 5137.51        | 5137.56        |
| [K-KIIIA]-PEG80]                                 | 84 Å          | 3153.31        | 3153.32        |

**Figure S8:** Analytical RP-HPLC chromatogram and high-resolution mass spectra of [m<sub>3</sub>-HwTx-IV]-[PEG80]-[K-KIIIA], and table of calculated and observed masses of all conjugated ligands. (A) RP-HPLC chromatogram and ESI-MS spectrum observed with LC-ESI-MS (positive ion mode) and reconstructed mass spectrum for [m<sub>3</sub>-HwTx-IV]-[PEG80]-[K-KIIIA] using a high-resolution TripleTOF 5600 mass spectrometer (AB Sciex). (B) Linker lengths (measured with Avogadro software<sup>4</sup>) and calculated and observed mass values for the bivalent ligands and controls. RP-HPLC was performed using analytical C<sub>18</sub> column at a flow rate of 0.2 mL/min and a 1% linear gradient ranging from 0 to 45% solvent B, where solvent A was 0.05% TFA in water, and solvent B was 0.043% TFA in 90/10% (v/v) acetonitrile/water. Mcalc.: calculated ion mass; Mobs.: experimental observed ion mass.



## References

- (1) Shen, H.; Liu, D.; Wu, K.; Lei, J.; Yan, N. Structures of human Na<sub>v</sub>1.7 channel in complex with auxiliary subunits and animal toxins. *Science* **2019**, 363, 1303–1308.
- (2) Pan, X.; Li, Z.; Huang, X.; Huang, G.; Gao, S.; Shen, H.; Liu, L.; Lei, J.; Yan, N. Molecular basis for pore blockade of human Na<sup>+</sup> channel Na<sub>v</sub>1.2 by the μ-conotoxin KIII A. *Science* **2019**, 363, 1309–1313.
- (3) Khoo, K. K.; Gupta, K.; Green, B. R.; Zhang, M. M.; Watkins, M.; Olivera, B. M.; Balaram, P.; Yoshikami, D.; Bulaj, G.; Norton, R. S. Distinct disulfide isomers of μ-conotoxins KIII A and KIII B block voltage-gated sodium channels. *Biochemistry* **2012**, 51, 9826–9835.
- (4) Hanwell, M. D.; Curtis, D. E.; Lonie, D. C.; Vandermeersch, T.; Zurek, E.; Hutchison, G. R. Avogadro: an advanced semantic chemical editor, visualization, and analysis platform. *J. Cheminform.* **2012**, 4, 17.
